# Supplementary material
Source: publisher figshare collection journal article supplement (https://adisjournals.figshare.com/ndownloader/files/31020649)
Supplement: Supplementary file 1 [file 31020649]

# A Clinicopathological Study of Cytomegalovirus Lymphadenitis and Tonsillitis & Their Association with Epstein-Barr Virus

Shan-Chi Yu, Kuan-Yin Ko, Shu-Chun Teng, Tai-Chung Huang, Hsiao-Ting Lo, Chieh-Lung Cheng, Ming Yao, Ruey-Long Hong, Chun-Nan Chen, Tseng-Cheng Chen, and Tsung-Lin Yang

## Background

Histopathological characteristics of cytomegalovirus lymphadenitis have been well-described, but the clinical features have not.

Histologically confirmed CMV lymphadenitis should be different from CMV primary infections with lymphadenopathy.

## Methods

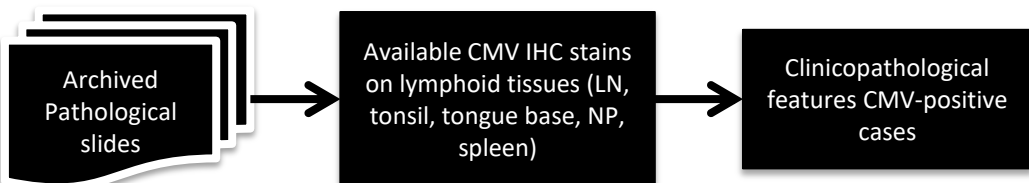

## Results

|                              | CMV-positive cases                                       | CMV-negative cases                               |
|------------------------------|----------------------------------------------------------|--------------------------------------------------|
| <b>Allo-PBSCT recipients</b> | 2–4 years after PBSCT<br>The middle-aged and the elderly | Earlier after PBSCT<br>Children and young adults |
| <b>Post-Auto-PBSCT</b>       | 1–2 years after PBSCT<br>Older-aged                      | Later after PBSCT<br>Younger-aged                |
| <b>Post-chemotherapy</b>     | 1–4 years after chemotherapy<br>Older-aged               | Younger-aged                                     |
| <b>Immunocompetent</b>       | Heterogeneous                                            |                                                  |

### CMV-positive cases

**Clinical presentation:** Neck mass or asymptomatic  
**PET/CT scan:** 100% more uptake than the liver  
 80% Deauville score 4–5  
**mimicking lymphoma relapse**

**EBV coinfection :** 96% patients  
**unique staining pattern of EBER**

Mild or no symptom  
but mimicking relapse

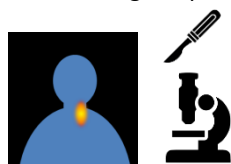

CMV-positive cases accounted for 30%  
of false-positive PET scan in  
lymphoma patients

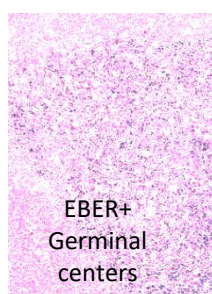

## Conclusions

1. CMV lymphadenitis typically developed a few years after lymphoma treatment (allogeneic and autologous PBSCT and chemotherapy) in the middle-aged and the elderly.
2. CMV lymphadenitis and tonsillitis were subclinical infections mimicking lymphoma relapse in positron emission tomography scans.
3. CMV lymphadenitis frequently had Epstein-Barr virus coinfection, and EBER-positive cells were predominantly in the germinal centers.

The graphical abstract represents the opinions of the authors. For a full list of declarations, including funding and author disclosure statements, please see the full text online. © The authors, CC-BY-NC 2021. DOI: 10.1007/s40121-021-00528-1

PEER-REVIEWED  
INFOGRAPHIC

OPEN  
ACCESS
